# Supplementary material for: Hydrothermally prepared MnSe electrode as a promising pseudocapacitive material for high-performance supercapacitor
Source: Royal Society of Chemistry journal article supplement (doi:10.1039/d3nj01326j), 2023-01-01
Supplement: d3nj01326j1.pdf [file d3nj01326j1.pdf]

## Supporting Information

### **Hydrothermally prepared MnSe electrode as a promising pseudocapacitive material for high-performance supercapacitor**

Haisong Duan<sup>a</sup>, Shaolan Wang <sup>a\*</sup>, Beijun Li<sup>a</sup>, Shuan Ma<sup>b\*</sup>

<sup>a</sup> School of Materials Science and Engineering, Shaanxi Key Laboratory of Green Preparation and Functionalization for Inorganic Materials, Shaanxi University of Science and Technology, 710021, Xi'an, People's Republic of China.

<sup>b</sup> National Center for Electron Microscopy in Beijing, School of Materials Science and Engineering, The State Key Laboratory of New Ceramics and Fine Processing, Key Laboratory of Advanced Materials (MOE), Tsinghua University, Beijing 100084, People's Republic of China

\*Corresponding author

Shuan Ma(Shuan@mail.tsinghua.edu.cn)

Shaolan Wang(wsl198926@163.com)

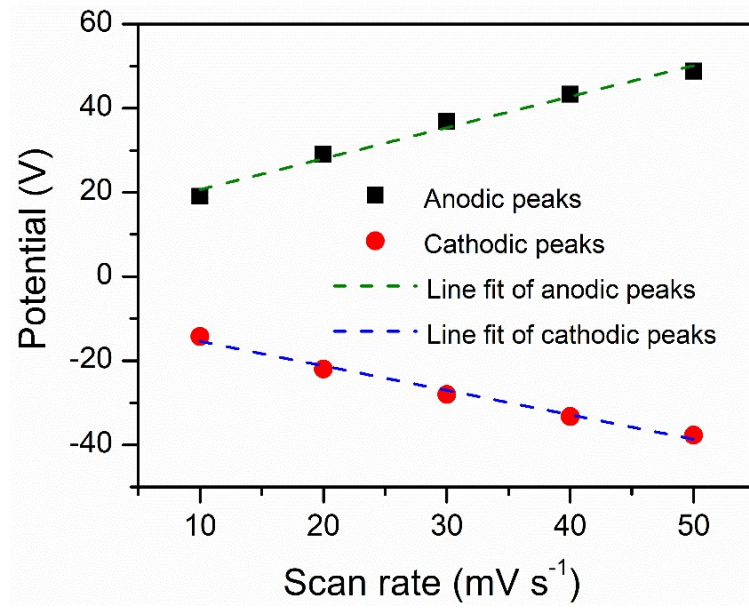

Fig. S1 Plots of anodic and corresponding cathodic peak density of MnSe electrode versus the square root of the scan rate.

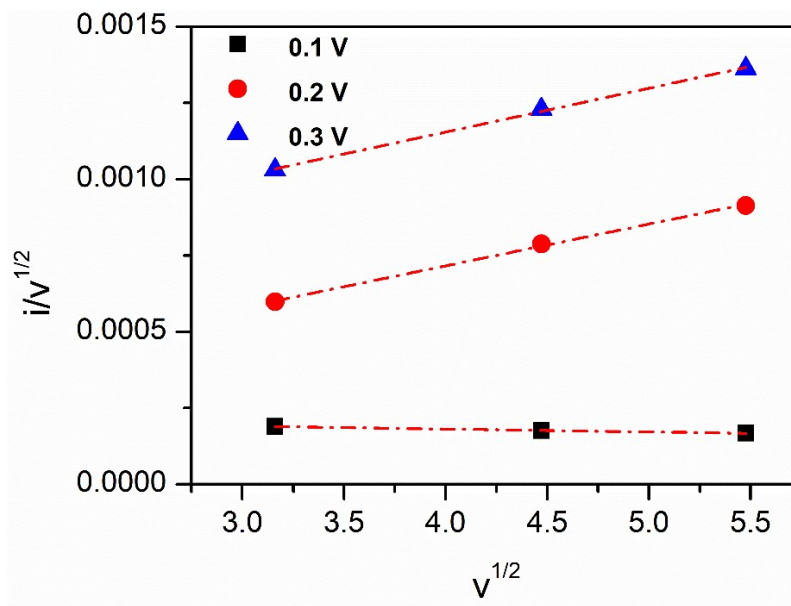

Fig. S2 The plot of  $\frac{1}{v^2} vs \frac{1}{i v^2}$  to calculate the constant  $k_1$  and  $k_2$  at different potentials and scan rates.
